# Supplementary material for: How Accurate and Precise Can We Measure the Posture and the Energy Expenditure Component of Sedentary Behaviour with One Sensor?
Source: Int J Environ Res Public Health. 2021 May 27;18(11):5782. doi: 10.3390/ijerph18115782 (PMC8198866; doi:10.3390/ijerph18115782)
Supplement: Supplementary file 1 [file ijerph-18-05782-s001.zip › ijerph-1220657-supplementary.pdf]

## Supplementary Material

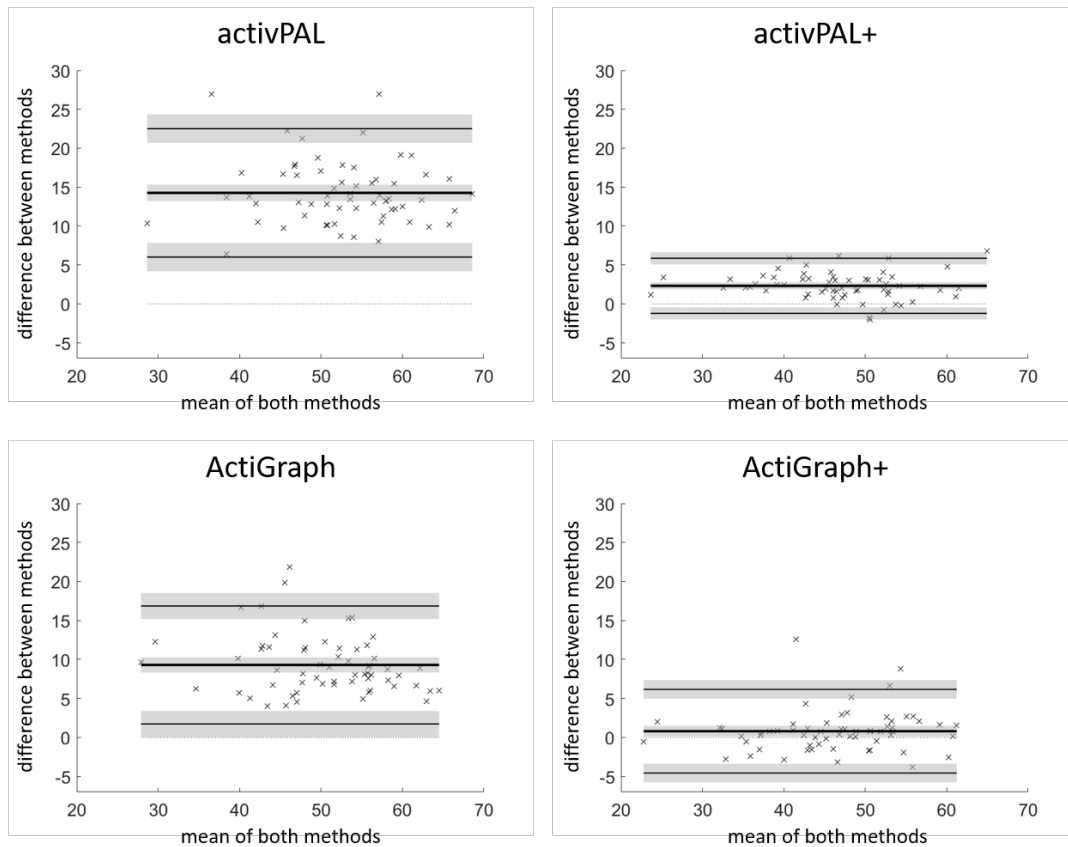

**Figure S1.** Bland-Altman plots for average sedentary time per day, expressed in relation to wear-time. Indicated is the bias (bold line) and the 95% limits of agreement (thin lines), both with 95% confidence interval (in grey).

**Table S1.** Accuracy and precision of all trained activPAL algorithms in the development and comparison sample.

|                                                       | # Features | Additional Feature                    | Development Sample |                 | Comparison Sample |                 | Generalisability |                  |
|-------------------------------------------------------|------------|---------------------------------------|--------------------|-----------------|-------------------|-----------------|------------------|------------------|
|                                                       |            |                                       | Bias               | LoA Range       | Bias              | LoA Range       | Bias             | LoA Range        |
| Algorithms with<br>time- and frequency-based features | 1          | Range (y)                             | 3.2                | 13.5            | 5.0               | 10.6            | 1.8              | -2.9             |
|                                                       | 2          | Range (x)                             | 2.9                | 12.8            | 4.2               | 9.4             | 1.3              | -3.4             |
|                                                       | 3          | Abs Signal Change Sum (x)             | 3.0                | 11.9            | 3.9               | 9.6             | 0.9              | -2.3             |
|                                                       | 4          | Abs Signal Change Sum (x filt)        | 2.8                | 10.4            | 3.5               | 7.7             | 0.7              | -2.7             |
|                                                       | 5          | Minimum (x angle)                     | 2.8                | 8.7             | 3.5               | 7.9             | 0.7              | -0.8             |
|                                                       | 6          | Abs Signal Change Sum (VM)            | 2.8                | 9.0             | 3.5               | 7.6             | 0.7              | -1.4             |
|                                                       | 7          | Abs Signal Change Sum (y angle)       | 2.4                | 9.1             | 2.8               | 7.1             | 0.4              | -2.0             |
|                                                       | 8          | Range (x angle)                       | 2.5                | 8.9             | 3.1               | 7.3             | 0.6              | -1.6             |
|                                                       | 9          | Band Power (0.3-3Hz) (x)              | 2.2                | 7.0             | 2.8               | 7.2             | 0.6              | 0.2              |
|                                                       | 10         | Lag 1Hz Autocorrelation (x)           | 2.1                | 9.1             | 2.5               | 7.0             | 0.4              | -2.1             |
|                                                       | 11         | Band Power (0.3-3Hz) (y)              | 2.3                | 8.7             | 2.7               | 7.1             | 0.4              | -1.6             |
|                                                       | 12         | Lag 1Hz Autocorrelation (z filt)      | 0.6                | 1.9             | 2.3               | 7.1             | 1.7              | 5.2              |
|                                                       | 13         | Range (z filt)                        | 2.3                | 7.9             | 2.8               | 7.1             | 0.5              | -0.8             |
|                                                       | 14         | Coefficient of Variation (VM)         | 2.4                | 8.0             | 2.9               | 7.0             | 0.5              | -1.0             |
|                                                       | 15         | Mean Frequency (0.3-3Hz) (x)          | 2.4                | 7.8             | 2.9               | 7.1             | 0.5              | -0.7             |
|                                                       | 16         | 3 <sup>rd</sup> Moment (0.3-3Hz) (x)  | 2.3                | 7.6             | 2.8               | 7.1             | 0.5              | -0.5             |
|                                                       | 17         | Abs Signal Change Sum (z filt)        | 2.4                | 8.7             | 2.9               | 7.0             | 0.5              | -1.7             |
| <b>Average (mean ± SD)</b>                            |            |                                       | <b>2.4 ±0.6</b>    | <b>8.9 ±2.6</b> | <b>3.2 ±0.7</b>   | <b>7.7 ±1.1</b> | <b>0.7 ±0.4</b>  | <b>-1.2 ±1.9</b> |
| Algorithms with<br>time-based features                | 1          | Range (y)                             | 2.5                | 12.9            | 4.1               | 10.1            | 1.6              | -2.8             |
|                                                       | 2          | Interquartile Range (x)               | 3.1                | 12.6            | 4.8               | 9.6             | 1.7              | -3.0             |
|                                                       | 3          | Range (x)                             | 2.9                | 12.0            | 4.1               | 8.6             | 1.2              | -3.4             |
|                                                       | 4          | Abs Signal Change Sum (x)             | 3.1                | 11.4            | 4.1               | 8.9             | 1.0              | -2.5             |
|                                                       | 5          | Abs Signal Change Sum (VM)            | 2.6                | 10.7            | 3.2               | 8.7             | 0.6              | -2.0             |
|                                                       | 6          | Coefficient of Variation (x)          | 2.7                | 9.6             | 3.2               | 8.5             | 0.5              | -1.1             |
|                                                       | 7          | Standard Deviation (x)                | 2.3                | 6.5             | 3.0               | 8.3             | 0.7              | 1.8              |
|                                                       | 8          | Correlation (x to z)                  | 2.5                | 9.2             | 2.9               | 8.0             | 0.4              | -1.2             |
|                                                       | 9          | Standard Deviation (y)                | 2.8                | 9.4             | 3.3               | 7.7             | 0.5              | -1.7             |
|                                                       | 10         | Minimum (x)                           | 2.1                | 8.6             | 2.6               | 7.8             | 0.5              | -0.8             |
|                                                       | 11         | Kurtosis (y)                          | 2.4                | 8.2             | 2.9               | 7.9             | 0.5              | -0.3             |
|                                                       | 12         | 5 <sup>th</sup> Percentile (y)        | 2.0                | 5.5             | 3.1               | 7.9             | 1.1              | 2.4              |
|                                                       | 13         | 25 <sup>th</sup> Percentile (x)       | 2.3                | 8.8             | 2.9               | 7.8             | 0.6              | -1.0             |
|                                                       | 14         | Skewness (x)                          | 2.7                | 10.2            | 3.4               | 8.4             | 0.7              | -1.8             |
|                                                       | 15         | Correlation (x to y)                  | 2.2                | 7.8             | 2.9               | 7.8             | 0.7              | 0.0              |
| <b>Average (mean ± SD)</b>                            |            |                                       | <b>2.5 ±0.3</b>    | <b>9.6 ±2.1</b> | <b>3.4 ±0.6</b>   | <b>8.4 ±0.7</b> | <b>0.8 ±0.4</b>  | <b>-1.2 ±1.6</b> |
| Algorithms with<br>cross-recurrent features           | 1          | Clustering Coefficient (x)            | 9.6                | 13.1            | 11.0              | 13.2            | 1.4              | 0.1              |
|                                                       | 2          | Clustering Coefficient (y)            | 9.7                | 12.9            | 11.0              | 13.0            | 1.3              | 0.1              |
|                                                       | 3          | Recurrence Rate (x)                   | 7.7                | 11.7            | 9.1               | 11.3            | 1.4              | -0.4             |
|                                                       | 4          | Clustering Coefficient (z)            | 7.9                | 11.3            | 9.1               | 11.2            | 1.2              | -0.1             |
|                                                       | 5          | Rec Period Density Entropy (x)        | 6.5                | 10.3            | 7.3               | 8.4             | 0.8              | -1.9             |
|                                                       | 6          | Rec Time of 2 <sup>nd</sup> Type (y)  | 5.2                | 10.0            | 5.6               | 7.4             | 0.4              | -2.6             |
|                                                       | 7          | Rec Time of 2 <sup>nd</sup> Type (VM) | 3.8                | 9.6             | 4.4               | 7.7             | 0.6              | -1.9             |
|                                                       | 8          | Average Diagonal Length (x)           | 4.3                | 10.1            | 4.9               | 7.9             | 0.6              | -2.2             |
|                                                       | 9          | Clustering Coefficient (VM)           | 4.2                | 10.0            | 4.7               | 7.8             | 0.5              | -2.2             |
|                                                       | 10         | Rec Time of 2 <sup>nd</sup> Type (x)  | 1.5                | 2.9             | 3.0               | 7.8             | 1.5              | 4.9              |
|                                                       | 11         | Rec Period Density Entropy (z)        | 3.5                | 10.1            | 3.9               | 8.0             | 0.4              | -2.1             |
|                                                       | 12         | Average Diagonal Length (VM)          | 3.9                | 9.4             | 4.3               | 8.0             | 0.4              | -1.4             |
|                                                       | 13         | Laminarity (x)                        | 4.1                | 10.5            | 4.7               | 7.8             | 0.6              | -2.7             |
|                                                       | 14         | Entropy of Diagonal Length (z)        | 3.6                | 9.3             | 4.1               | 7.8             | 0.5              | -1.5             |
|                                                       | 15         | Transitivity (x)                      | 4.2                | 10.4            | 4.8               | 7.6             | 0.6              | -2.8             |
|                                                       | 16         | Trapping Time (y)                     | 3.0                | 6.9             | 3.9               | 7.9             | 0.9              | 1.0              |
|                                                       | 17         | Transitivity (y)                      | 3.9                | 9.7             | 4.4               | 8.0             | 0.5              | -1.7             |
|                                                       | 18         | Trapping Time (x)                     | 1.9                | 3.6             | 3.9               | 7.8             | 2.0              | 4.2              |
|                                                       | 19         | Laminarity (VM)                       | 3.6                | 8.6             | 4.1               | 7.9             | 0.5              | -0.7             |
| <b>Average (mean ± SD)</b>                            |            |                                       | <b>4.8 ±2.3</b>    | <b>9.5 ±2.6</b> | <b>5.7 ±2.5</b>   | <b>8.8 ±1.9</b> | <b>0.8 ±0.5</b>  | <b>-0.7 ±2.2</b> |

Numbers presented in % of wear-time (100% equals 14.9 hours,  $n_{\text{Development}} = 38$ ,  $n_{\text{Comparison}} = 62$ ). The generalisability indicates the drop of the bias and range of the 95% limit of agreement (LoA Range) from the development to the comparison sample, with negative values representing an improvement. Each algorithm used one feature more as the previous algorithm, i.e. the algorithm used in the method comparison used the 12 features marked in grey. Details about the feature calculation can be found in [15] (time and frequency features) and [22] (cross-recurrent features). Abbreviations: Abs (absolute), filt (low-pass filtered data, Butterworth 2<sup>nd</sup> order, 0.5 Hz cut-off), angle (elevation angle of one axis (e.g. x for x angle) against the plane spanned by the other two axes (e.g. y and z for x angle), calculated on filtered data), VM (Vector Magnitude), SD (Standard Deviation), Rec (recurrence).

**Table S2.** Properties of all trained activPAL algorithms.

|                                                    | # Features | Additional Feature                    | Method      | Split Criterion | Tree Size | Max # of Splits | Min Leaf Size | Learn Rate |
|----------------------------------------------------|------------|---------------------------------------|-------------|-----------------|-----------|-----------------|---------------|------------|
| Algorithms with time- and frequency-based features | 1          | Range (y)                             | Bag         | gdi             | 40        | 99              | 2'123         | N/A        |
|                                                    | 2          | Range (x)                             | Bag         | deviance        | 14        | 15              | 4             | N/A        |
|                                                    | 3          | Abs Signal Change Sum (x)             | Bag         | gdi             | 13        | 182             | 81            | N/A        |
|                                                    | 4          | Abs Signal Change Sum (x filt)        | Bag         | deviance        | 13        | 222             | 48            | N/A        |
|                                                    | 5          | Minimum (x angle)                     | Bag         | gdi             | 12        | 118'684         | 29            | N/A        |
|                                                    | 6          | Abs Signal Change Sum (VM)            | Bag         | deviance        | 47        | 914             | 3             | N/A        |
|                                                    | 7          | Abs Signal Change Sum (y angle)       | Bag         | deviance        | 16        | 38'191          | 87            | N/A        |
|                                                    | 8          | Range (x angle)                       | Bag         | gdi             | 15        | 569             | 34            | N/A        |
|                                                    | 9          | Band Power (0.3-3Hz) (x)              | Bag         | gdi             | 123       | 2'723           | 1             | N/A        |
|                                                    | 10         | Lag 1Hz Autocorrelation (x)           | LogitBoost  | N/A             | 484       | 5               | 12'092        | 0.89       |
|                                                    | 11         | Band Power (0.3-3Hz) (y)              | Bag         | gdi             | 12        | 49'119          | 64            | N/A        |
|                                                    | 12         | Lag 1Hz Autocorrelation (z filt)      | GentleBoost | N/A             | 466       | 1'253           | 9             | 0.43       |
|                                                    | 13         | Range (z filt)                        | Bag         | deviance        | 10        | 2'472           | 28            | N/A        |
|                                                    | 14         | Coefficient of Variation (VM)         | Bag         | deviance        | 13        | 137'977         | 29            | N/A        |
|                                                    | 15         | Mean Frequency (0.3-3Hz) (x)          | Bag         | gdi             | 203       | 5'780           | 17            | N/A        |
|                                                    | 16         | 3 <sup>rd</sup> Moment (0.3-3Hz) (x)  | Bag         | gdi             | 29        | 83'429          | 25            | N/A        |
|                                                    | 17         | Abs Signal Change Sum (z filt)        | Bag         | gdi             | 11        | 1'243           | 75            | N/A        |
| Algorithms with time-based features                | 1          | Range (y)                             | GentleBoost | N/A             | 33        | 25'327          | 2             | 0.00       |
|                                                    | 2          | Interquartile Range (x)               | LogitBoost  | N/A             | 358       | 4               | 301           | 0.12       |
|                                                    | 3          | Range (x)                             | Bag         | gdi             | 22        | 7'028           | 154           | N/A        |
|                                                    | 4          | Abs Signal Change Sum (x)             | Bag         | gdi             | 469       | 138'156         | 50            | N/A        |
|                                                    | 5          | Abs Signal Change Sum (VM)            | AdaBoost    | deviance        | 127       | 8               | 743           | 0.62       |
|                                                    | 6          | Coefficient of Variation (x)          | Bag         | deviance        | 11        | 1'363           | 23            | N/A        |
|                                                    | 7          | Standard Deviation (x)                | Bag         | gdi             | 471       | 15'801          | 6             | N/A        |
|                                                    | 8          | Correlation (x to z)                  | AdaBoost    | gdi             | 10        | 84'858          | 189           | 0.06       |
|                                                    | 9          | Standard Deviation (y)                | Bag         | gdi             | 18        | 44'860          | 127           | N/A        |
|                                                    | 10         | Minimum (x)                           | AdaBoost    | deviance        | 37        | 923             | 1             | 0.05       |
|                                                    | 11         | Kurtosis (y)                          | Bag         | deviance        | 11        | 10'579          | 23            | N/A        |
|                                                    | 12         | 5 <sup>th</sup> Percentile (y)        | Bag         | deviance        | 494       | 68'524          | 3             | N/A        |
|                                                    | 13         | 25 <sup>th</sup> Percentile (x)       | Bag         | deviance        | 10        | 764             | 17            | N/A        |
|                                                    | 14         | Skewness (x)                          | Bag         | deviance        | 11        | 106'758         | 269           | N/A        |
|                                                    | 15         | Correlation (x to y)                  | Bag         | deviance        | 30        | 1'845           | 5             | N/A        |
| Algorithms with cross-recurrent features           | 1          | Clustering Coefficient (x)            | Bag         | gdi             | 105       | 3               | 5             | N/A        |
|                                                    | 2          | Clustering Coefficient (y)            | GentleBoost | N/A             | 356       | 1'858           | 4             | 0.04       |
|                                                    | 3          | Recurrence Rate (x)                   | Bag         | deviance        | 10        | 41              | 1             | N/A        |
|                                                    | 4          | Clustering Coefficient (z)            | Bag         | deviance        | 12        | 141             | 95            | N/A        |
|                                                    | 5          | Rec Period Density Entropy (x)        | Bag         | deviance        | 12        | 770             | 1             | N/A        |
|                                                    | 6          | Rec Time of 2 <sup>nd</sup> Type (y)  | AdaBoost    | gdi             | 47        | 570             | 38            | 0.03       |
|                                                    | 7          | Rec Time of 2 <sup>nd</sup> Type (VM) | GentleBoost | N/A             | 489       | 56              | 3'550         | 0.02       |
|                                                    | 8          | Average Diagonal Length (x)           | Bag         | deviance        | 13        | 438             | 7             | N/A        |
|                                                    | 9          | Clustering Coefficient (VM)           | Bag         | gdi             | 13        | 6'614           | 153           | N/A        |
|                                                    | 10         | Rec Time of 2 <sup>nd</sup> Type (x)  | GentleBoost | N/A             | 499       | 98              | 1             | 0.00       |
|                                                    | 11         | Rec Period Density Entropy (z)        | GentleBoost | N/A             | 491       | 2               | 19            | 0.08       |
|                                                    | 12         | Average Diagonal Length (VM)          | Bag         | deviance        | 21        | 1'694           | 3             | N/A        |
|                                                    | 13         | Laminarity (x)                        | GentleBoost | N/A             | 498       | 1               | 12            | 0.00       |
|                                                    | 14         | Entropy of Diagonal Length (z)        | Bag         | gdi             | 16        | 14'909          | 41            | N/A        |
|                                                    | 15         | Transitivity (x)                      | GentleBoost | N/A             | 303       | 1               | 371           | 0.00       |
|                                                    | 16         | Trapping Time (y)                     | Bag         | deviance        | 20        | 3'834           | 1             | N/A        |
|                                                    | 17         | Transitivity (y)                      | Bag         | deviance        | 58        | 18'302          | 123           | N/A        |
|                                                    | 18         | Trapping Time (x)                     | Bag         | deviance        | 99        | 42'565          | 3             | N/A        |
|                                                    | 19         | Laminarity (VM)                       | Bag         | gdi             | 19        | 1'726           | 4             | N/A        |

Abbreviations: Max (maximum), Min (minimum), Bag (bagging), N/A (not applicable, the different methods require different properties), Abs (absolute), filt (low-pass filtered data, Butterworth 2<sup>nd</sup> order, 0.5 Hz cut-off), angle (elevation angle of one axis (e.g. x for x angle) against the plane spanned by the other two axes (e.g. y and z for x angle), calculated on filtered data), VM (Vector Magnitude), LogitBoost (adaptive logistic regression), GentleBoost (gentle adaptive boosting), AdaBoost (adaptive boosting), Rec (recurrence).

**Table S3.** Average sedentary time per day measured with each single sensor method compared to POPAI, in relation to wear-time.

| Method     | Sedentary Time $\pm$ SD | Absolute Bias ( $\pm$ SE) | Relative Bias ( $\pm$ SE) | [95% LoA] ( $\pm$ SE) | RMSE | Correlation [CI] |
|------------|-------------------------|---------------------------|---------------------------|-----------------------|------|------------------|
| activPAL   | 60.0 $\pm$ 8.1          | 14.3 $\pm$ 0.5            | 33.1 $\pm$ 2.0%           | [6.0; 22.5] $\pm$ 0.9 | 14.8 | 0.87 [0.80-0.92] |
| activPAL+  | 48.0 $\pm$ 8.2          | 2.3 $\pm$ 0.2             | 5.4 $\pm$ 0.5%            | [-1.2; 5.9] $\pm$ 0.4 | 2.9  | 0.98 [0.96-0.99] |
| ActiGraph  | 55.0 $\pm$ 7.5          | 9.3 $\pm$ 0.5             | 21.9 $\pm$ 1.6%           | [1.7; 16.9] $\pm$ 0.8 | 10.0 | 0.89 [0.83-0.93] |
| ActiGraph+ | 46.5 $\pm$ 8.6          | 0.8 $\pm$ 0.3             | 1.9 $\pm$ 0.8%            | [-4.6; 6.2] $\pm$ 0.6 | 2.8  | 0.95 [0.92-0.97] |

Data given in % of wear-time, except relative bias (in % of POPAI sedentary time and thus indicating over-/underestimation) and correlation (unit less). Abbreviations: SD (Standard Deviation), SE (Standard Error), LoA (Limits of Agreement), RMSE (Root Mean Square Error), CI (Confidence Interval).

**Table S4.** Average sedentary time per day accumulated in bouts  $\geq 10$  and  $\geq 30$  minutes measured with each single sensor method compared to POPAI, in relation to wear-time.

| Method                                                | Sedentary Time $\pm$ SD | Absolute Bias ( $\pm$ SE) | Relative Bias ( $\pm$ SE) | [95% LoA] ( $\pm$ SE)  | RMSE | Correlation [CI] |
|-------------------------------------------------------|-------------------------|---------------------------|---------------------------|------------------------|------|------------------|
| Sedentary time accumulated in bouts $\geq 10$ minutes |                         |                           |                           |                        |      |                  |
| activPAL                                              | 49.6 $\pm$ 8.6          | 22.7 $\pm$ 0.9            | 105.5 $\pm$ 10.3%         | [8.6; 36.9] $\pm$ 1.6  | 23.8 | 0.68 [0.52-0.80] |
| activPAL+                                             | 29.8 $\pm$ 9.5          | 2.9 $\pm$ 0.5             | 13.2 $\pm$ 2.3%           | [-4.5; 10.3] $\pm$ 0.8 | 4.7  | 0.92 [0.87-0.95] |
| ActiGraph                                             | 32.7 $\pm$ 9.3          | 5.8 $\pm$ 0.4             | 25.0 $\pm$ 2.2%           | [0.2; 11.4] $\pm$ 0.6  | 6.4  | 0.95 [0.93-0.97] |
| ActiGraph+                                            | 25.9 $\pm$ 9.5          | -1.0 $\pm$ 0.3            | -4.2 $\pm$ 1.0%           | [-5.0; 3.1] $\pm$ 0.4  | 2.2  | 0.98 [0.96-0.99] |
| Sedentary time accumulated in bouts $\geq 30$ minutes |                         |                           |                           |                        |      |                  |
| activPAL                                              | 29.2 $\pm$ 7.8          | 20.9 $\pm$ 0.9 #          | 534.7 $\pm$ 117.8%        | [7.5; 34.3] $\pm$ 1.5  | 22.0 | 0.50 [0.28-0.67] |
| activPAL+                                             | 9.4 $\pm$ 6.0           | 1.1 $\pm$ 0.4             | 26.8 $\pm$ 7.4%           | [-5.0; 7.2] $\pm$ 0.7  | 3.2  | 0.87 [0.79-0.92] |
| ActiGraph                                             | 11.1 $\pm$ 6.7          | 2.8 $\pm$ 0.2 #           | 49.8 $\pm$ 6.4%           | [-1.1; 6.7] $\pm$ 0.4  | 3.5  | 0.95 [0.92-0.97] |
| ActiGraph+                                            | 8.1 $\pm$ 6.0           | -0.2 $\pm$ 0.1            | -2.0 $\pm$ 3.0%           | [-2.4; 2.0] $\pm$ 0.2  | 1.1  | 0.98 [0.97-0.99] |

Data given in % of wear-time, except relative bias (in % of POPAI sedentary time) and correlation (unit less). The hashtags mark the methods for which the bias depended on the mean of both methods. Abbreviations: SD (Standard Deviation), SE (Standard Error), LoA (Limits of Agreement), RMSE (Root Mean Square Error), CI (Confidence Interval).

**Table S5.** Validity of the activPAL posture classification applied to free-living data.

| activPAL Prediction        | Ground Truth Behavior |          |            | Validity             |                      |                      |
|----------------------------|-----------------------|----------|------------|----------------------|----------------------|----------------------|
|                            | Sitting               | Standing | Locomotion | Sensitivity          | Specificity          | PPV                  |
| <b>Contingency Table 1</b> |                       |          |            |                      |                      |                      |
| Sitting                    | 55.6%                 | 0.7%     | 0.2%       | 0.95 <sup>[31]</sup> | 0.98 <sup>[31]</sup> |                      |
| Standing                   | 2.0%                  | 25.5%    | 0.0%       | 0.88 <sup>[8]</sup>  | 0.97 <sup>[8]</sup>  |                      |
| Locomotion                 | 1.0%                  | 2.9%     | 13.0%      | 0.98 <sup>[8]</sup>  | 0.96 <sup>[8]</sup>  |                      |
| Total <sup>[16]</sup>      | 58.5%                 | 29.1%    | 13.2%      |                      |                      |                      |
| <b>Contingency Table 2</b> |                       |          |            |                      |                      |                      |
| Sitting                    | 58.3%                 | 0.4%     | 0.0%       | 0.99 <sup>[32]</sup> |                      | 0.99 <sup>[32]</sup> |
| Standing                   | 0.3%                  | 25.5%    | 1.3%       | 0.90 <sup>[32]</sup> |                      | 0.94 <sup>[32]</sup> |
| Locomotion                 | 0.0%                  | 2.5%     | 11.7%      | 0.90 <sup>[32]</sup> |                      | 0.82 <sup>[32]</sup> |
| Total <sup>[16]</sup>      | 58.6%                 | 28.4     | 13.0%      |                      |                      |                      |

Validity of the activPAL reported in Basset et al. 2014 [8] and Kim et al. 2015 [31] (Contingency Table 1), and reported in Grant et al. 2006 [32] (Contingency Table 2). Numbers applied to the sitting, standing, and locomotion classification of the activPAL in Kuster et al. 2020 [16]. Note that the numbers slightly deviate from the literature data due to different behaviors captured in each study. Since Kim et al. 2015 only reported the validity for sitting, the results of Basset et al. 2014 were added in Contingency Table 1.

**Table S6.** Validity of POPAI, the Posture and Physical Activity Index.

| POPAI Prediction   | Ground Truth Behavior |                |                   |                 | Validity    |             |             |
|--------------------|-----------------------|----------------|-------------------|-----------------|-------------|-------------|-------------|
|                    | Sedentary Behavior    | Active Sitting | Inactive Standing | Active Standing | Loco-motion | Sensitivity | Specificity |
| Sedentary Behavior | 41.4%                 | 4.0%           | 0.2%              | 0.2%            | 0.1%        | 0.925       | 0.919       |
| Active Sitting     | 2.2%                  | 9.2%           | 0.1%              | 0.1%            | 0.0%        | 0.678       | 0.973       |
| Inactive Standing  | 0.4%                  | 0.1%           | 10.0%             | 4.3%            | 0.3%        | 0.828       | 0.943       |
| Active Standing    | 0.5%                  | 0.1%           | 0.7%              | 10.4%           | 0.4%        | 0.630       | 0.979       |
| Locomotion         | 0.4%                  | 0.1%           | 1.1%              | 1.5%            | 12.3%       | 0.941       | 0.964       |
| Total              | 44.8%                 | 13.5%          | 12.1%             | 16.5%           | 13.1%       |             |             |

Validity of the activPAL (average of Table S5) combined with the validity of the ActiGraph 75 counts-per-minute cut-point to separate inactive and active sitting (sensitivity of 0.951 and specificity of 0.697) and the 150 counts-per-minute cut-point to separate inactive and active standing (sensitivity of 0.932 and specificity of 0.709) reported in Kuster et al. 2021 [33].
